# Supplementary material
Source: Royal Society of Chemistry journal article supplement (doi:10.1039/d5tb02912k)
Supplement: d5tb02912k1.pdf [file d5tb02912k1.pdf]

## Bismuth Hybrid Halide with Dual Inhibition against Alzheimer's and Type 2 Diabetes Probed by Structural, Vibrational, and Theoretical Analysis

Assala Bahloul<sup>a\*</sup>, Mehdi Messaad<sup>b</sup>, Sirine Smaoui<sup>c</sup>, Bassem Khemakhem<sup>c</sup>, Mohamed Abdelhedi<sup>a</sup>

<sup>a</sup>Laboratory of Inorganic Chemistry, Faculty of Sciences of Sfax, BP 1171, 3000 Sfax, University of Sfax, Tunisia.

<sup>b</sup>Laboratory of Medicinal and Environmental Chemistry, Higher Institute of Biotechnology, BP 261, 3000 Sfax, University of Sfax, Tunisia.

<sup>c</sup>Laboratory of Plant Biotechnology, Faculty of Sciences of Sfax, BP 1171 3000 Sfax, University of Sfax, Tunisia.

\*Correspondence: [assala.bahloul@fss.u-sfax.tn](mailto:assala.bahloul@fss.u-sfax.tn) ; Tel (+216 51 991 452)

**Table 1.S.** The character table for C<sub>2h</sub>.

| C <sub>2h</sub> | E | C <sub>2</sub> | i  | σ <sub>h</sub> | Linear/Quadratic Functions                            | Activity     |
|-----------------|---|----------------|----|----------------|-------------------------------------------------------|--------------|
| <b>Ag</b>       | 1 | 1              | 1  | 1              | X <sup>2</sup> , y <sup>2</sup> , z <sup>2</sup> , xy | Raman-active |
| <b>Bg</b>       | 1 | -1             | 1  | -1             | xz, yz                                                | Raman-active |
| <b>Au</b>       | 1 | 1              | -1 | -1             | z, translations (Tz)                                  | IR-active    |
| <b>Bu</b>       | 1 | -1             | -1 | 1              | x, y, translations (Tx, Ty)                           | IR-active    |

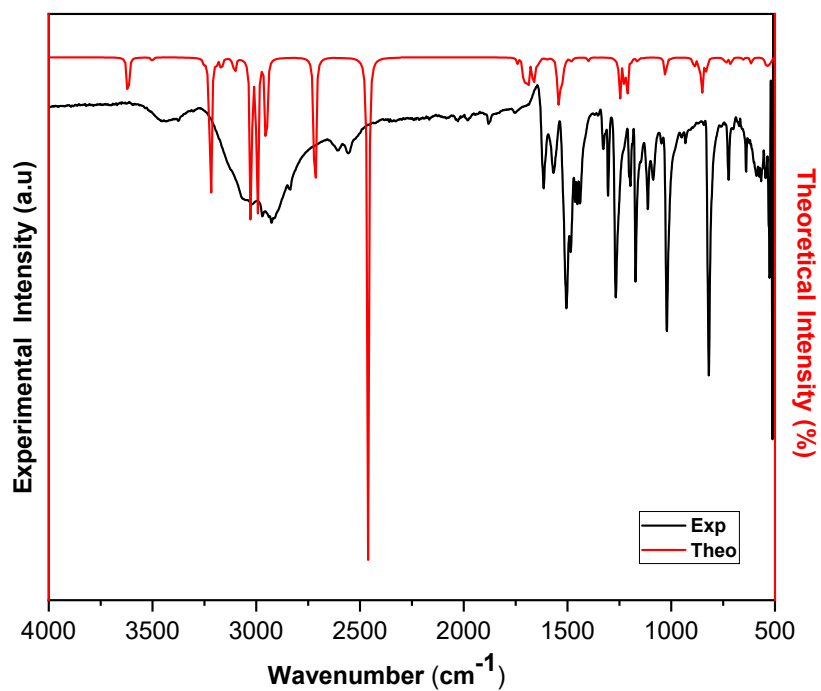

**Fig. 1.S.** Raman FT-IR spectrum of the hybrid compound  $(C_7H_{10}NO)_4[BiCl_6] \cdot Cl \cdot H_2O$ .

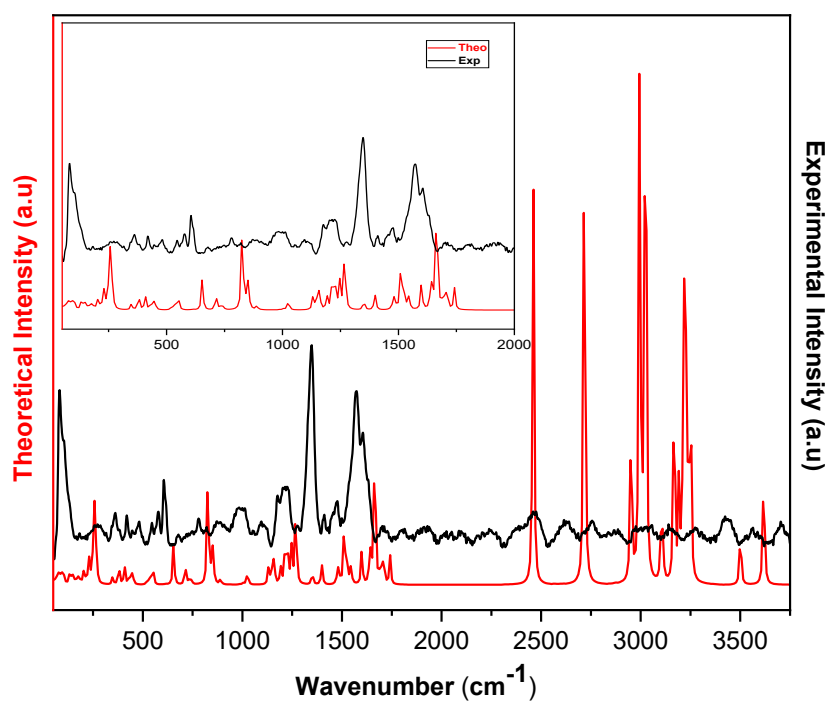

**Fig. 2.S.** Raman spectrum of the hybrid compound  $(C_7H_{10}NO)_4[BiCl_6] \cdot Cl \cdot H_2O$ .

**Table 2.S.** Correlation of  $O_h$  and  $C_{2h}$  Vibrational Modes and Their Spectroscopic Activity.

| $O_h$ Mode       | $C_{2h}$ Components     | Activity        |
|------------------|-------------------------|-----------------|
| $A_{1g} (\nu_1)$ | Ag (symmetric stretch)  | Raman           |
| $E_g (\nu_2)$    | Ag + Bg (split)         | Raman           |
| $T_{1u} (\nu_3)$ | Au + Bu (antisymmetric) | IR              |
| $T_{2g} (\nu_4)$ | Ag + Bg (split)         | Raman           |
| $T_{2u} (\nu_5)$ | Au + Bu (split)         | IR (if allowed) |

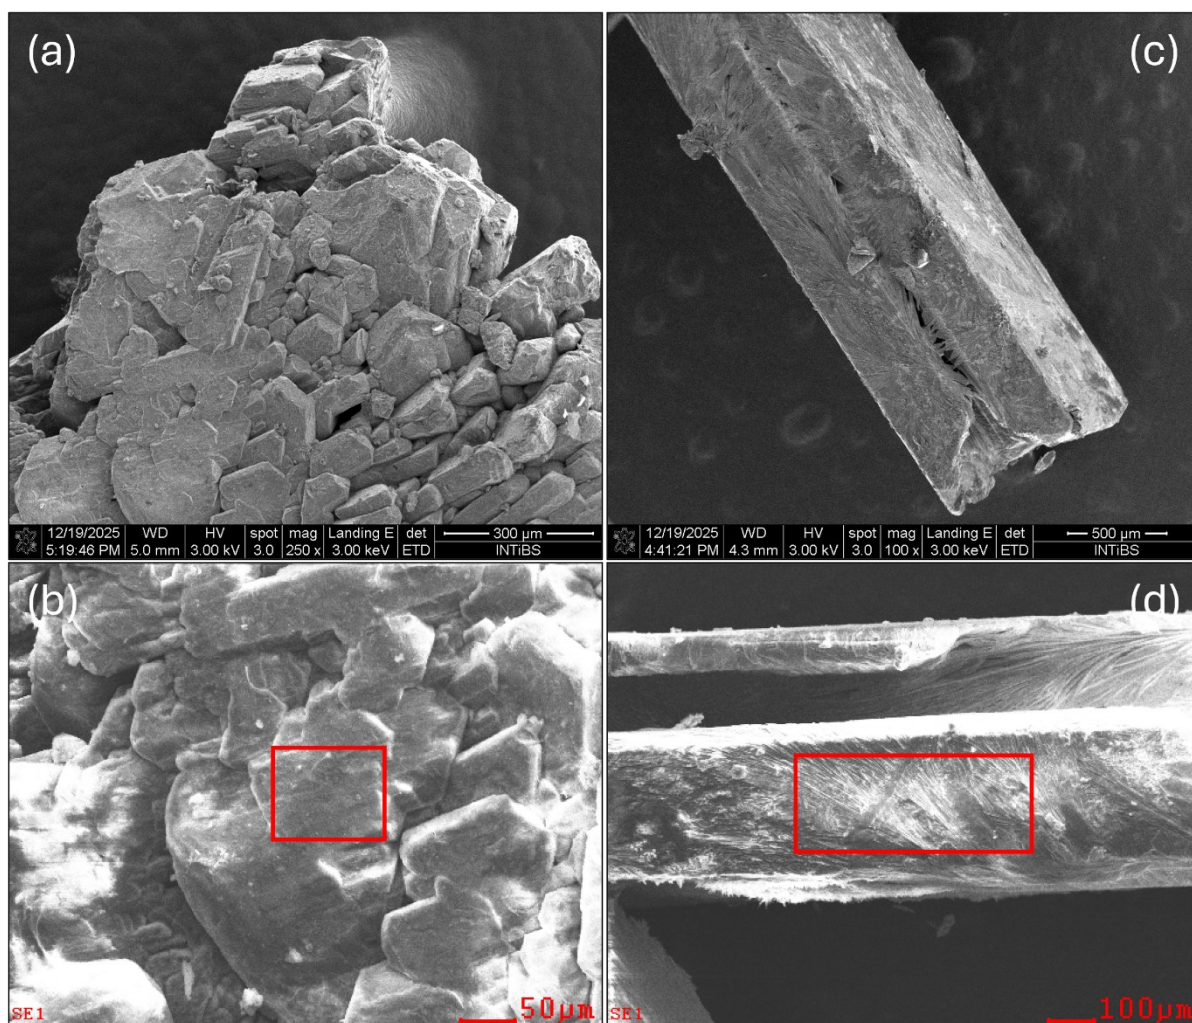

**Fig. 3.S.** Scanning electron microscopy (SEM) images showing the surface morphology of  $(C_7H_{10}NO)_3[SbCl_5] \cdot Cl \cdot H_2O$  (a,b) and  $(C_7H_{10}NO)_4[BiCl_6] \cdot Cl \cdot H_2O$  (c,d) at different micrometer-scale magnifications.

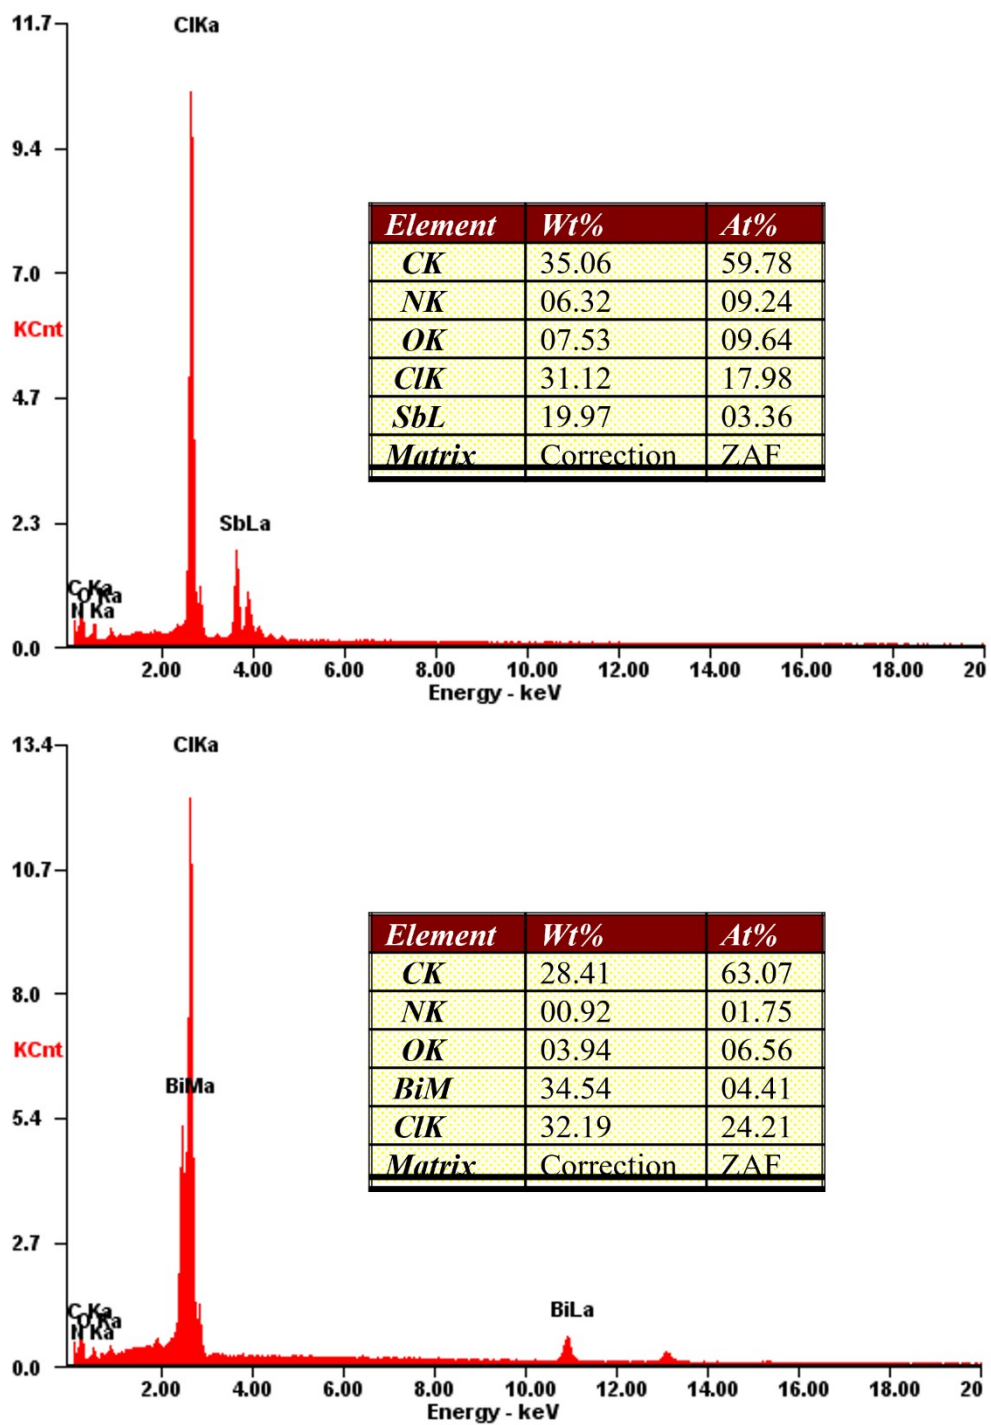

Fig. 4.S. EDS spectrum and elemental composition of  $(C_7H_{10}NO)_3[SbCl_5] \cdot Cl \cdot H_2O$  and  $(C_7H_{10}NO)_4[BiCl_6] \cdot Cl \cdot H_2O$ .

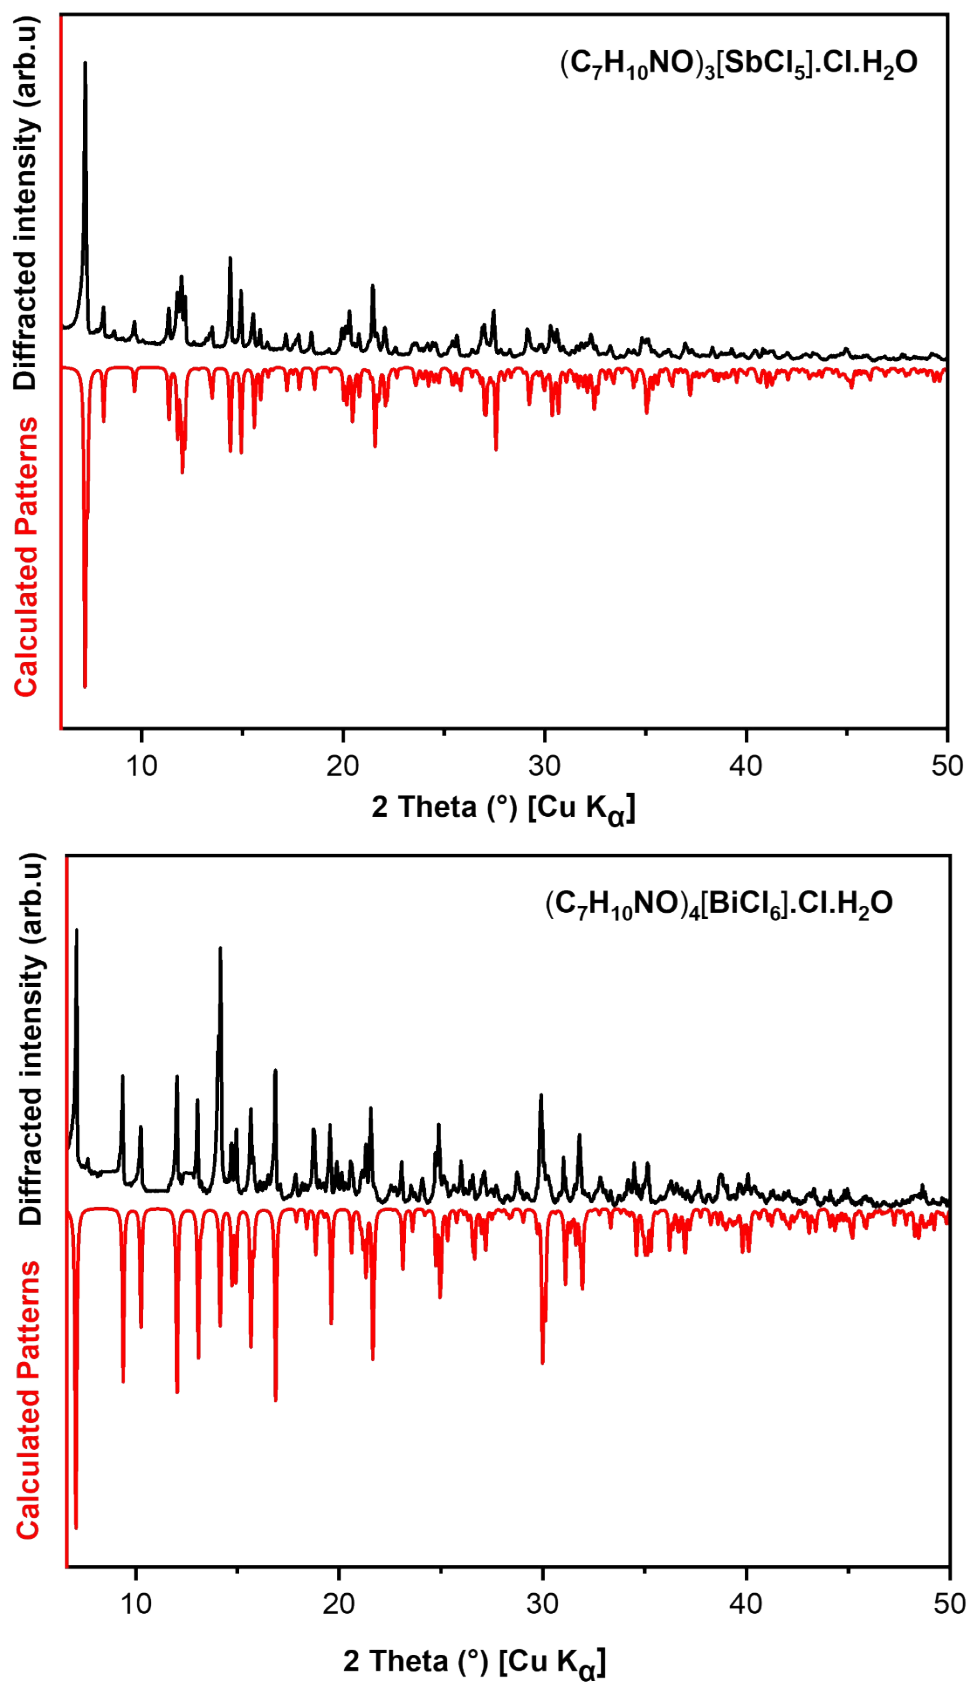

**Fig. 5.S.** Room-temperature experimental and simulated powder X-ray diffraction patterns of the Sb- and Bi-based hybrid compounds.
